# Supplementary material
Source: PubMed Central journal article supplement (PMC3909953)
Supplement: NIHMS544595-supplement-supplementary_data.pdf [file NIHMS544595-supplement-supplementary_data.pdf]

## Supplementary Online Content

Schroth W, Goetz M, Hamann U, et al. Association between CYP2D6 polymorphisms and outcomes among women with early stage breast cancer treated with tamoxifen. *JAMA*. 2009;302(13):1429-1436.

**eAppendix.** Participating Centers/Genotyping Methods/Statistical Calculations

**eTable.** Investigated *CYP2D6* Variants

**eFigure.** Kaplan-Meier Estimates of Time-To-Recurrence Stratified by *CYP2D6* Copy Numbers

This supplementary material has been provided by the authors to give readers additional information about their work.

## **eAppendix.** Participating Centers/Genotyping Methods/Statistical Calculations

### **Participating Centers**

Breast Center, Robert Bosch Krankenhaus Stuttgart, Germany; Dr. Margarete Fischer-Bosch-Institute of Clinical Pharmacology, Stuttgart, Germany; Frauenklinik Städtisches Klinikum Karlsruhe, Germany; University Breast Center Franconia, University Hospital Erlangen, Germany; Department of Gynecology and Obstetrics, University of Mainz, Germany; Department of Oncology, Mayo Clinic, Rochester, Minnesota (patients from NCCTG 89-30-52 randomized phase 3 clinical trial in postmenopausal women comparing tamoxifen alone versus tamoxifen in combination with the androgen fluoxymesterone).

### **Genotyping Methods**

Genotyping at Dr. Margarete Fischer-Bosch-Institute of Clinical Pharmacology, Stuttgart, was with matrix-assisted laser desorption/ionisation time-of-flight mass spectrometry (MALDI-TOF MS) using Sequenom platform. Genotyping at Mayo Clinic was done with Taqman Real Time quantification. For *CYP2D6* gene duplication and \*5 deletion allele a Taqman Real Time quantification assay was applied to blood and fresh-frozen tumor-derived DNA, but not for paraffin-derived samples for technical reasons.

### **Statistical Analysis: Calculation of the Hypothetical Survival Curve for Anastrozole**

Supposing the Cox proportionality hazard assumption, a hypothetical anastrozole survival curve was calculated via an assumed hazard ratio of  $HR_{AI/TAM} = 0.76$  for anastrozole relative to tamoxifen<sup>29</sup> and the Kaplan-Meier  $\hat{S}_{TAM}$  estimate of the unstratified tamoxifen cohort of the present study. Precisely, our estimate  $\hat{S}_{AI}$  of the anastrozole survival curve is computed by  $\ln(\hat{S}_{AI}(t)) = HR_{AI/TAM} \cdot \ln(\hat{S}_{TAM}(t))$  for every time point  $t$ .<sup>40</sup>

**eTable.** Investigated *CYP2D6* Variants

| <b>Variant</b> | <b>Position / Change</b> | <b>Predicted phenotype</b> |
|----------------|--------------------------|----------------------------|
| No variant     |                          | EM                         |
| *3             | 2549A>del                | PM                         |
| *4             | 1846G>A                  | PM                         |
| *5             | Gene deletion            | PM                         |
| *1, *2 X 2     | Gene duplication         | UM                         |
| *10            | 100C>T                   | IM                         |
| *41            | 2988G>A                  | IM                         |

**eFigure.** Kaplan-Meier Estimates of Time-to-Recurrence Stratified by *CYP2D6* Copy Numbers

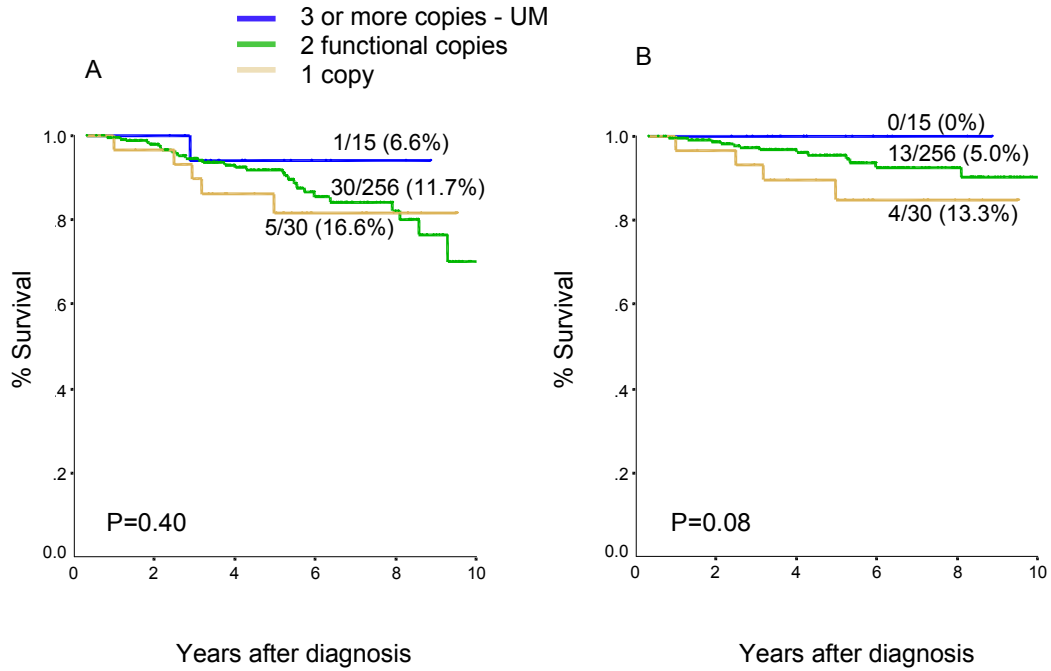

Kaplan-Meier recurrence-free-time distributions truncated after 10 years for UM (3 or more functional copies), 2 functional copies, and one single copy of the *CYP2D6* gene with number of events/number of patients (percent of patients with event). A. All recurrences used as endpoint. B. Local breast events including contralateral breast cancer used as endpoint.
